# Supplementary material for: Aerosol assisted chemical vapour deposition of Ga-doped ZnO films for energy efficient glazing: effects of doping concentration on the film growth behaviour and opto-electronic properties
Source: Royal Society of Chemistry journal article supplement (doi:10.1039/c5ta02163d), 2015-01-01
Supplement: c5ta02163d1.pdf [file c5ta02163d1.pdf]

# Aerosol Assisted Chemical Vapour Deposition of Ga-doped ZnO Films for Energy Efficient Glazing: Effects of Doping Concentration on the Film Growth Behaviour and Opto-electronic Properties

Shuqun Chen<sup>a</sup>, Giorgio Carraro<sup>b</sup>, Davide Barreca<sup>c</sup>, Andrei Sapelkin<sup>d</sup>, Wenzhi Chen<sup>e</sup>, Xuan  
Huang<sup>e</sup>, Qijin Cheng<sup>e</sup>, Fengyan Zhang<sup>e</sup>, Russell Binions<sup>a\*</sup>

<sup>a</sup> *School of Engineering and Materials Science, Queen Mary University of London, London E1 4NS, UK.*

*E-mail: r.binions@qmul.ac.uk*

<sup>b</sup> *Department of Chemistry and INSTM, Padova University, 35131 Padova, Italy.*

<sup>c</sup> *CNR-IENI and INSTM, Department of Chemistry, Padova University, 35131 Padova, Italy.*

<sup>d</sup> *Department of Physics and Astronomy, Queen Mary University of London, London E1 4NS, UK.*

<sup>e</sup> *School of Energy Research, Xiamen University, Xiamen 361005, China.*

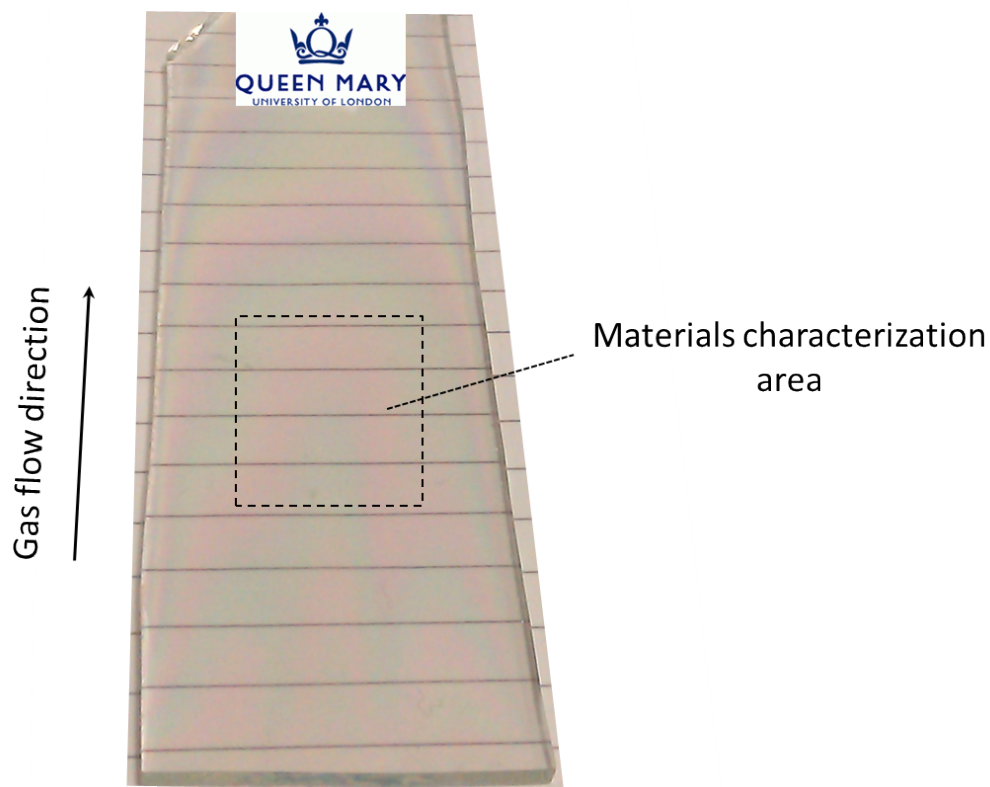

Figure S1 Photograph showing transparent ZnO:Ga film grown by AACVD on glass substrate. The uniform area in the middle of the glass substrate was selected for materials characterization

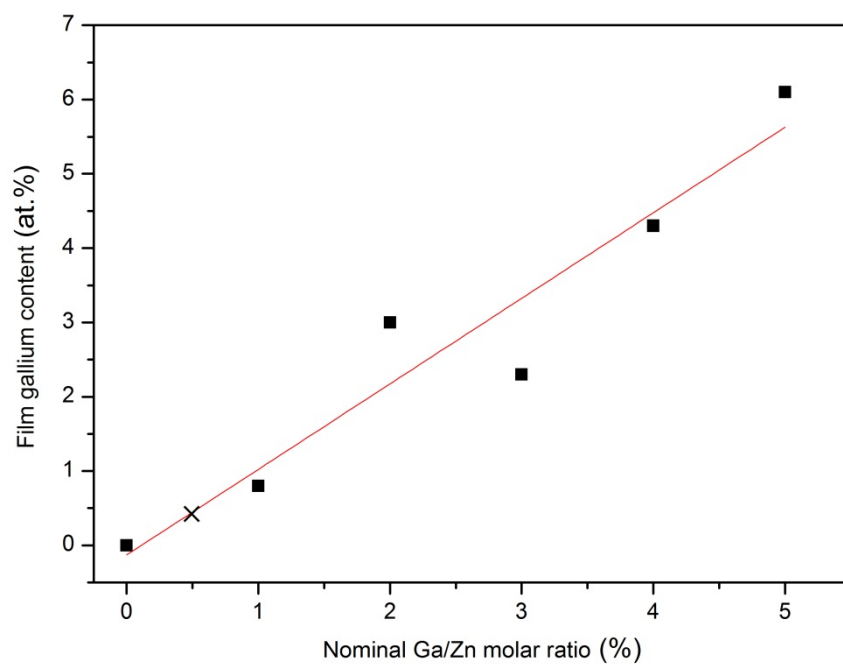

Figure S2 Evolution of the film gallium content as a function of the nominal Ga/Zn molar ratio in precursor solution.

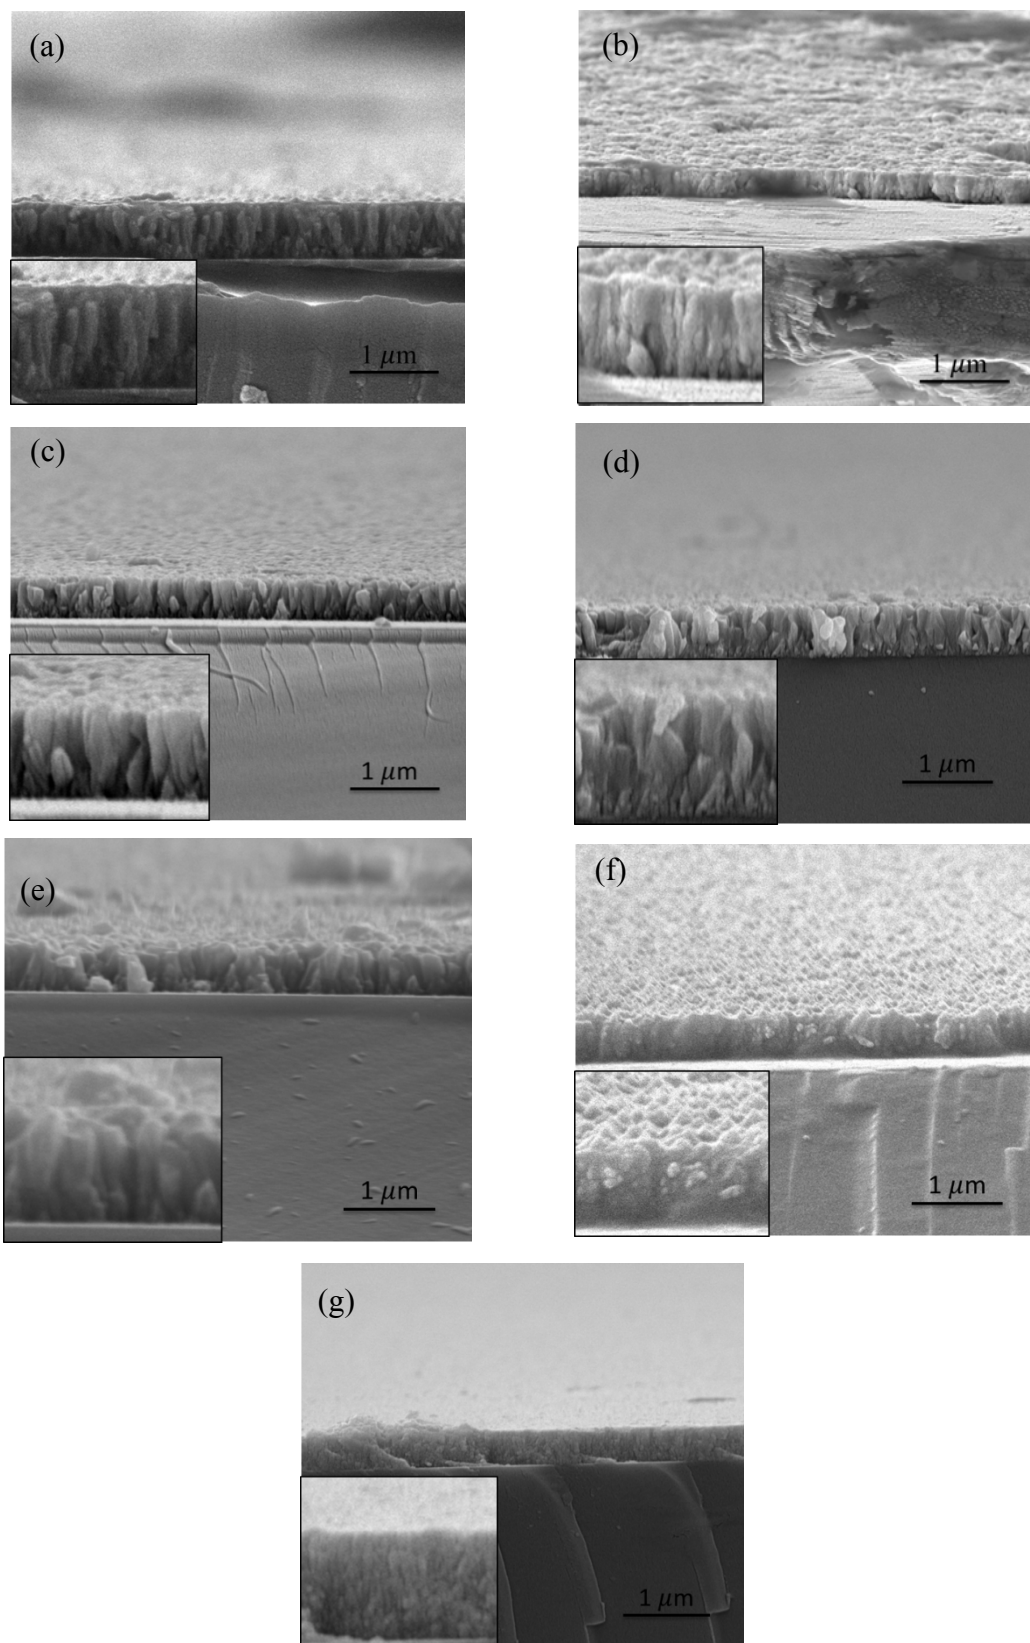

Figure S3 Cross-sectional SEM images of (a) ZnO, (b) ZnO:Ga(0.4), (c) ZnO:Ga(0.8), (d) ZnO:Ga(2.3), (e) ZnO:Ga(3.0), (f) ZnO:Ga(4.3) and (g) ZnO:Ga(6.1) films. The insets show higher magnification images for each sample.

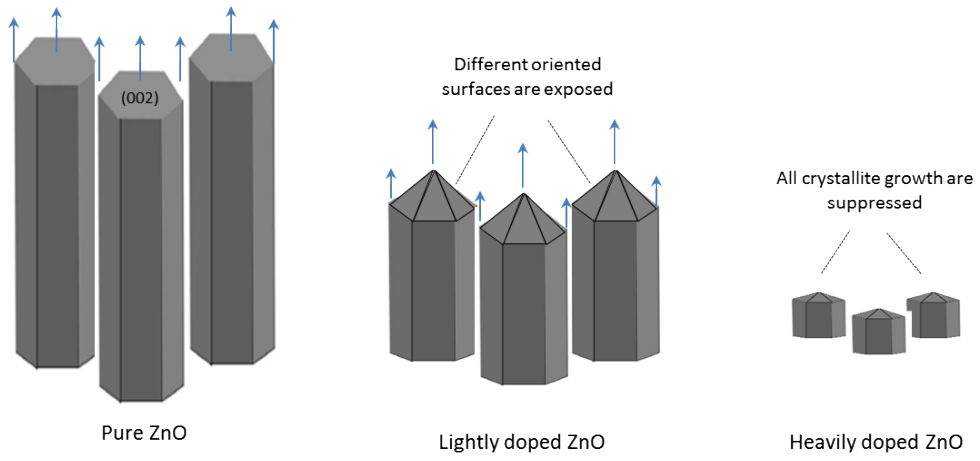

Figure S4 Schematic illustration of the growth behaviour in pure and doped ZnO film.

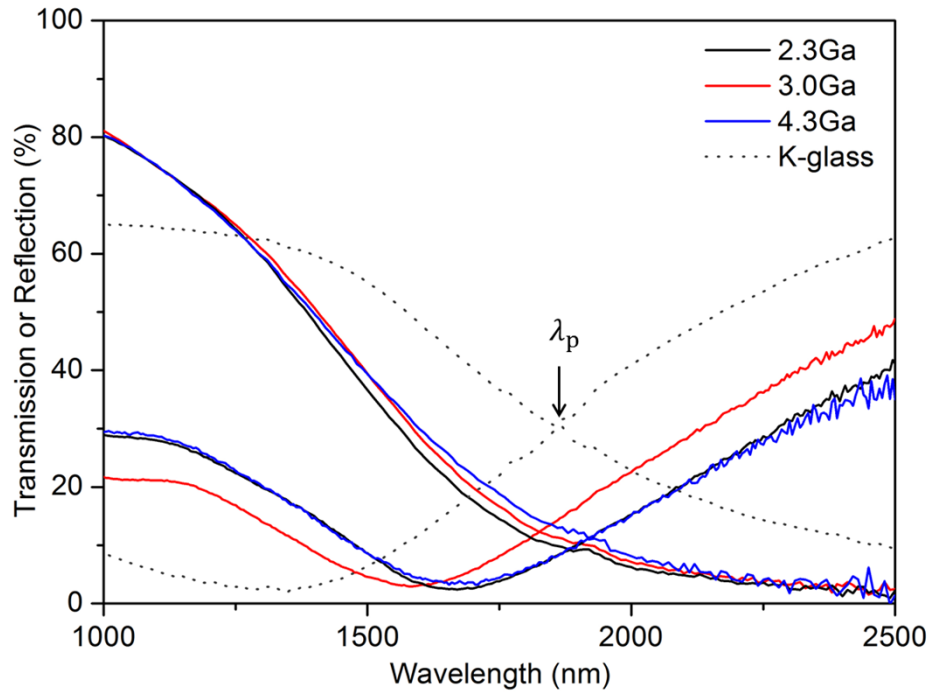

Figure S5 Transmission and reflection spectra of ZnO:Ga(2.3), ZnO:Ga(3.0) and ZnO:Ga(4.3) in the near infrared light. The intersection point corresponds to the plasma wavelength.
